# Supplementary material for: The synthesis and characterization of mono and dinuclear group 13 complexes derived from a Schiff base
Source: Royal Society of Chemistry journal article supplement (doi:10.1039/c2dt30375b), 2012-01-01

## The synthesis and characterization of mono and dinuclear group 13 Schiff base complexes

Antonino Aprile, David D. J. Wilson and Anne F. Richards\*

Department of Chemistry, La Trobe Institute for Molecular Sciences, La Trobe University,  
Melbourne, Australia, 3086

### Supplementary Information

#### **S1:** Crystal Data for Compounds **1 - 7:**

| Compound Name       | <b>1</b>                                                                      | <b>2</b>                                                         | <b>3</b>                                                                                      | <b>4</b>                                                                                        |
|---------------------|-------------------------------------------------------------------------------|------------------------------------------------------------------|-----------------------------------------------------------------------------------------------|-------------------------------------------------------------------------------------------------|
|                     | [L{Al(Me) <sub>2</sub> } <sub>2</sub> ]                                       | [{(NO)Al(thf) <sub>2</sub> }I]                                   | [H <sub>2</sub> L{GaCl(Me) <sub>2</sub> } <sub>2</sub> ]                                      | [{LGaCl} <sub>2</sub> (μLi)]GaCl <sub>4</sub>                                                   |
| Chemical Formula    | C <sub>16</sub> H <sub>30</sub> Al <sub>2</sub> N <sub>2</sub> O <sub>2</sub> | C <sub>20</sub> H <sub>34</sub> AlIN <sub>2</sub> O <sub>4</sub> | C <sub>16</sub> H <sub>32</sub> Ga <sub>2</sub> Cl <sub>2</sub> N <sub>2</sub> O <sub>2</sub> | C <sub>24</sub> H <sub>36</sub> Ga <sub>3</sub> Cl <sub>6</sub> LiN <sub>4</sub> O <sub>4</sub> |
| Formula Weight      | 336.38                                                                        | 520.37                                                           | 494.78                                                                                        | 873.37                                                                                          |
| Crystal System      | Triclinic                                                                     | Monoclinic                                                       | Triclinic                                                                                     | Orthorhombic                                                                                    |
| Space Group         | P-1                                                                           | C 2 / c                                                          | P-1                                                                                           | Pccn                                                                                            |
| T(K)                | 123(2)                                                                        | 123(2)                                                           | 123(2)                                                                                        | 173(2)                                                                                          |
| a (Å)               | 5.8360(6)                                                                     | 12.7840(10)                                                      | 6.9600(2)                                                                                     | 11.0058(5)                                                                                      |
| b (Å)               | 8.5491(10)                                                                    | 14.1352(9)                                                       | 7.3178(3)                                                                                     | 19.6503(9)                                                                                      |
| c (Å)               | 10.8312(11)                                                                   | 29.117(2)                                                        | 11.7649(4)                                                                                    | 16.5196(9)                                                                                      |
| α (°)               | 68.177(10)                                                                    | 90                                                               | 80.036(3)                                                                                     | 90                                                                                              |
| β (°)               | 80.886(8)                                                                     | 97.139(7)                                                        | 88.925(3)                                                                                     | 90                                                                                              |
| γ (°)               | 71.595(10)                                                                    | 90                                                               | 75.353(3)                                                                                     | 90                                                                                              |
| V (Å <sup>3</sup> ) | 475.49(9)                                                                     | 5220.7(7)                                                        | 570.79(3)                                                                                     | 3572.6(3)                                                                                       |

|                                                          |                               |                              |                           |                           |
|----------------------------------------------------------|-------------------------------|------------------------------|---------------------------|---------------------------|
| Z                                                        | 1                             | 8                            | 1                         | 4                         |
| Reflections collected                                    | 3757                          | 9835                         | 12375                     | 35029                     |
| Independent reflections                                  | 2180                          | 4697                         | 2599                      | 4602                      |
| Data/restraints/parameter ratio                          | 2180/0/104                    | 4697/0/266                   | 2599/0/117                | 4602/0/195                |
| R int                                                    | 0.0146                        | 0.0377                       | 0.0362                    | 0.0367                    |
| Dcalc (Mg/m <sup>3</sup> )                               | 1.175                         | 1.324                        | 1.439                     | 1.624                     |
| F(000)                                                   | 182                           | 2128                         | 254                       | 1752                      |
| R indices (all data)                                     | R1 = 0.0415 ,<br>wR2 = 0.1017 | R1 = 0.0544,<br>wR2 = 0.1458 | R1 = 0.0338, wR2 = 0.0654 | R1 = 0.0558, wR2 = 0.0894 |
| Final R indices [I > 2σ(I)]                              | R1 = 0.0354,<br>wR2 = 0.0962  | R1 = 0.0483,<br>wR2 = 0.1395 | R1 = 0.0270 wR2 = 0.0617  | R1 = 0.0367, wR2 = 0.0805 |
| Largest difference in peak and hole (e Å <sup>-3</sup> ) | 0.305 and -0.259              | 1.958 and -0.888             | 0.339 and -0.306          | 0.693 and - 0.344         |

**S 1 (contd).**

| Compound Name         | <b>5</b>                                                                                      | <b>6</b>                                                          | <b>7</b>                                                                      |
|-----------------------|-----------------------------------------------------------------------------------------------|-------------------------------------------------------------------|-------------------------------------------------------------------------------|
|                       | [LnCl] <sub>2</sub>                                                                           | [LnCl(thf)]                                                       | [L <sub>3</sub> In <sub>2</sub> ]                                             |
| Chemical Formula      | C <sub>31</sub> H <sub>44</sub> In <sub>2</sub> Cl <sub>2</sub> N <sub>4</sub> O <sub>4</sub> | C <sub>16</sub> H <sub>26</sub> InClN <sub>2</sub> O <sub>3</sub> | C <sub>44</sub> H <sub>64</sub> In <sub>2</sub> N <sub>6</sub> O <sub>6</sub> |
| Formula Weight        | 837.24                                                                                        | 444.66                                                            | 988.63                                                                        |
| Crystal System        | Triclinic                                                                                     | Monoclinic                                                        | Triclinic                                                                     |
| Space Group           | P-1                                                                                           | P21/n                                                             | P-1                                                                           |
| T(K)                  | 173(2)                                                                                        | 173(2)                                                            | 173(2)                                                                        |
| a (Å)                 | 9.4301(7)                                                                                     | 8.0463(14)                                                        | 8.5167(7)                                                                     |
| b (Å)                 | 9.6908(9)                                                                                     | 14.8894(7)                                                        | 11.0176(8)                                                                    |
| c (Å)                 | 11.2031(9)                                                                                    | 15.5567(7)                                                        | 12.5746(7)                                                                    |
| α (°)                 | 90.674(7)                                                                                     | 90                                                                | 80.165(6)                                                                     |
| β (°)                 | 110.084(7)                                                                                    | 93.294(8)                                                         | 80.237(5)                                                                     |
| γ (°)                 | 112.240(8)                                                                                    | 90                                                                | 73.433(7)                                                                     |
| V (Å <sup>3</sup> )   | 878.10(13)                                                                                    | 1860.7(3)                                                         | 1105.15(14)                                                                   |
| Z                     | 1                                                                                             | 4                                                                 | 1                                                                             |
| Reflections collected | 5976                                                                                          | 24793                                                             | 10106                                                                         |

|                                                          |                           |                           |                           |
|----------------------------------------------------------|---------------------------|---------------------------|---------------------------|
| Independent reflections                                  | 3427                      | 4740                      | 4908                      |
| Data/restraints/parameter ratio                          | 3427/73/213               | 4740/0/208                | 4908/7/292                |
| R int                                                    | 0.0559                    | 0.0316                    | 0.0286                    |
| Dcalc (Mg/m <sup>3</sup> )                               | 1.583                     | 1.587                     | 1.485                     |
| F(000)                                                   | 422                       | 904                       | 508                       |
| R indices (all data)                                     | R1 = 0.0505, wR2 = 0.1247 | R1 = 0.0477, wR2 = 0.0934 | R1 = 0.0421, wR2 = 0.0877 |
| Final R indices [I > 2σ(I)]                              | R1 = 0.0442, wR2 = 0.1187 | R1 = 0.0356, wR2 = 0.0854 | R1 = 0.0350, wR2 = 0.0838 |
| Largest difference in peak and hole (e Å <sup>-3</sup> ) | 1.675 and -0.996          | 0.883 and -0.949          | 0.681 and -0.589          |

S2: DSC Data for 7.

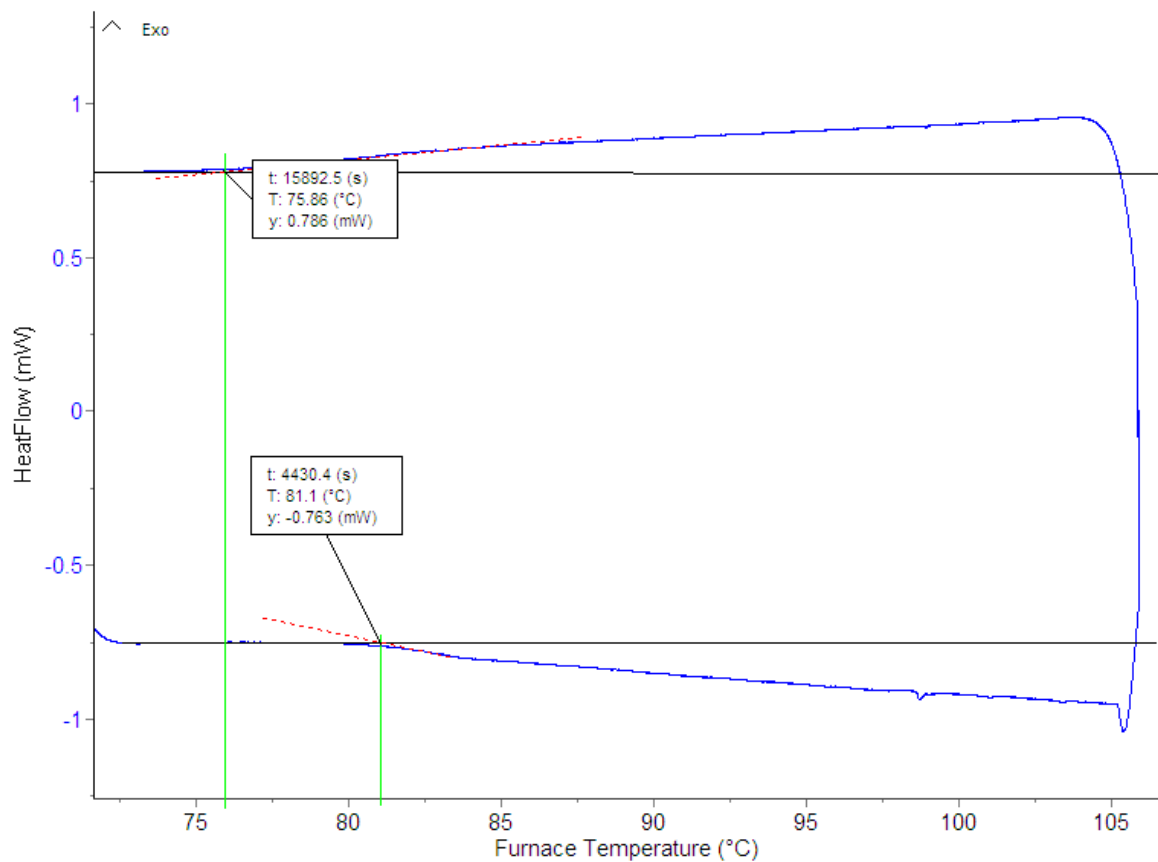

Supplement: c2dt30375b.pdf [file c2dt30375b.pdf]
